# Supplementary material for: Advantages of using biologically generated 13C-labelled multiple internal standards for stable isotope-assisted LC-MS-based lipidomics
Source: Royal Society of Chemistry journal article supplement (doi:10.1039/d3ay00460k), 2023-01-01
Supplement: d3ay00460k1.pdf [file d3ay00460k1.pdf]

## Supporting information:

### **Advantages of using biologically generated $^{13}\text{C}$ -labelled multiple internal standards for stable isotope-assisted LC-MS based lipidomics**

Malak A. Jaber,<sup>a,b,\*</sup> Bruna de Falco,<sup>b,\*</sup> Salah Abdelrazig,<sup>b</sup> Catharine A. Ortori,<sup>b</sup> David A. Barrett,<sup>b</sup>  
Dong-Hyun Kim<sup>b,\*</sup>

<sup>a</sup> Faculty of Pharmacy and Medical Sciences, University of Petra, Amman, Jordan

<sup>b</sup> Centre for Analytical Bioscience, Advanced Materials and Healthcare Technology Division, School of Pharmacy, University of Nottingham, University Park, Nottingham, NG7 2RD, United Kingdom

\* Corresponding author, e-mail address: [Dong-hyun.Kim@nottingham.ac.uk](mailto:Dong-hyun.Kim@nottingham.ac.uk)

\* Shared first authorship

## Supporting Information for Publication contains:

### Experimental section:

- Materials
- Biosynthesized <sup>13</sup>C-Internal Standard extraction
- Lipids extraction from plasma samples
- LC-MS lipidomics analysis
- Table S1. LipidSearch™ parameter used for lipid identification.
- Table S2. LipidSearch™ parameters used for alignment.
- Table S3. List of lipid standards from SPLASH LipidoMix used for normalisation.

### Results and Discussion section:

- Table S4. Lipid ions identified in *P. pastoris* and their <sup>13</sup>C-enrichment based on their labelling pattern and the labelling percentage of the fully labelled isotopologues.
- Figure S1. Total ion current (TIC) chromatograms of all microorganism extracts.
- Figure S2. Growth curve *E. coli* MG1655.
- Figure S3. Growth curve of *S. cerevisiae* CEN.PK 113-7D.
- Figure S4. Growth curve of *P. pastoris* NCYC175.
- Figure S5. Lipid class profiles of *E. coli* MG1655, *S. cerevisiae* CEN.PK 113-7D and *P. pastoris* NCYC 175.
- Figure S6. Comparison of full scan MS spectra and MS/MS spectra of recorded unlabelled and labelled *P. pastoris* extract

- Figure S7. Coefficient of variance distributions for normalization of different set of samples using different methods presented by box and whisker plots.

## **Materials**

D-Glucose, peptone, M9 minimal salts, magnesium sulphate heptahydrate, calcium chloride dihydrate, thiamine hydrochloride, propidium iodide and fluorescein diacetate were supplied by Sigma-Aldrich (St. Louis, USA). Bacto Agar was bought from Scientific Laboratory Supplies (Nottingham, UK), and the yeast extract from OXOID (Basingstoke, UK). The yeast nitrogen base without amino acids, L-methionine, L-histidine, L-leucine, uracil and the complete supplement mixture were bought from Formedium (Norfolk, UK).

## **Biosynthesized <sup>13</sup>C-Internal Standard extraction**

10 mL (OD<sub>600</sub>=1) of cellular suspension (for *A. platensis* samples 5 mg of lyophilised powder) were suspended in 2.5 mL methanol and vortexed for 5 min, then 1 mL de-ionised H<sub>2</sub>O and 1.25 mL chloroform were added and vortexed for 5 min at 4°C. Samples were then centrifuged for 10 min at 13000 g and the chloroform phases were dried under vacuum at room temperature. The dried samples were reconstituted using 200 µL of LC-MS grade isopropanol and stored at -80°C until analysis.

## **Lipids extraction from plasma samples**

50 µL of plasma were extracted with 500 µL of chloroform/methanol (1:2) and 100 µL of IS mixture, vortexed for 1 minute and mixed with 500 µL of water. The samples were vortexed for 5 minutes and additional 500 µL of chloroform were added to the solutions, vortexed and centrifuged at 13000 g for 10 minutes at 4°C. The lower chloroform phase (400 µL) was collected, and a second extraction was performed on the plasma samples by adding 500 µL of chloroform, vortexed for 5 minutes and centrifuged at 13000 g for 10 minutes at 4°C. The lower phase (400 µL) was combined with the previous extract. The organic phase was dried under vacuum at room temperature and reconstituted using 100 µL LC-MS grade isopropanol and stored at -80°C until further analysis.

## **LC-MS lipidomics analysis**

For LC analysis the mobile phases used were: (A) acetonitrile:ammonium acetate (40:60, final concentration of 10 mM) and (B) isopropanol:acetonitrile:ammonium acetate (80:10:10, final concentration of 10 mM). The gradient was as follows: 0 min: 30% B, flow rate 300  $\mu$ L, 2 min: 35% B, flow rate 300  $\mu$ L, 8 min: 100% B, flow rate 300  $\mu$ L, 17 min: 100% B, flow rate 500  $\mu$ L, 18-20 min: 20% B, flow rate 300  $\mu$ L. Column and autosampler temperatures were 45 and 4°C respectively. Sample injection volume was 10  $\mu$ L.

For MS analysis data were acquired simultaneously in a full scan ion mode at  $m/z$  100–1500, resolution of 70,000, automatic gain control<sup>45</sup> target of 3E6 and maximum ion injection time of 100 ms. Data were acquired in a tandem MS/MS mode at data-dependent MS/MS scans on top 5 precursor ions per scan, resolution of 17,500, AGC target of 1E5, maximum ion injection time of 50 ms, scan range from 200 to 2,000  $m/z$  and electrospray voltage of 4 kV. The capillary and heater temperatures were maintained at 256 and 413 °C, respectively. Sheath, auxiliary and sweep gas flow rate (arbitrary units) were adjusted to 48, 11 and 2, respectively. The raw data for LC-MS/MS were acquired and visualised with Xcalibur 2.2 software (Thermo Scientific, Hemel Hempstead, UK). The MS performance was assessed at each run using quality control samples (QC) interspaced between every 3-10 samples based on the total number of analysed samples. To obtain QC sample, an aliquot (10  $\mu$ L) of each biological sample was pooled together.

The list of labelled and unlabelled lipid species alongside their proposed identity and their expected RT identified using LipidSearch<sup>TM</sup> software was introduced as a database into Trace Finder software (Thermo Fisher Scientific, Waltham, MA) used to integrate and extract peaks areas of lipid pairs from the LC-MS/MS raw data based on mass error of 5 ppm, RT window of 30 s and S/N of 10. The performance was assessed by comparing the CV% across all metabolites and replicates.

**Table S1.** LipidSearch parameter used for lipid identification.

| <b>Search parameter</b>        | <b>Settings</b>                                                   |
|--------------------------------|-------------------------------------------------------------------|
| Database                       | Q-Exactive                                                        |
| Search type                    | Product                                                           |
| Experiment type                | LC-MS                                                             |
| Precursor tolerance            | 5 ppm                                                             |
| Product tolerance              | 5 ppm                                                             |
| Intensity threshold            | 1.0%                                                              |
| Execute Quantitation           | on                                                                |
| m/z tolerance (quantitation)   | -/+ 5.0 ppm                                                       |
| RT range (min.) (quantitation) | -/+ 0.5                                                           |
| Top rank filter                | On                                                                |
| Main node filter               | Main isomer peak                                                  |
| m-Score threshold              | 5.0 (1.0) *                                                       |
| c-Score threshold              | 2.0                                                               |
| FA priority                    | On                                                                |
| ID Quality Filter              | A, B, C and D                                                     |
| Target class                   | ALL lipid classes                                                 |
| Ion adducts (pos)              | H <sup>+</sup> , Na <sup>+</sup> and NH <sub>4</sub> <sup>+</sup> |
| Ion adducts (neg)              | H <sup>-</sup> and CH <sub>3</sub> COO <sup>-</sup>               |
| S/N                            | 2                                                                 |

\*m-Score threshold was selected as 1 when the lipids profile of different species was explored in order to include as much as possible of that species lipidome to get a better comparison between the studied species.

**Table S2.** LipidSearch parameters used for alignment.

| <b>Search parameter</b>        | <b>Setting</b>   |
|--------------------------------|------------------|
| Exp type                       | LC-MS            |
| Alignment method               | mean             |
| R.T. Tolerance                 | 0.5 min          |
| Calculate unassigned peak area | On               |
| Filter type                    | New filter       |
| Top rank filter                | On               |
| Main node filter               | Main isomer peak |
| m-Score threshold              | 5.0 (1.0) *      |
| ID quality filter              | A, B, C and D    |

\*m-Score threshold was selected as 1 when the lipids profile of different species was explored in order to include as much as possible of that species lipidome to get a better comparison between the studied species.

**Table S3.** List of lipid standards from SPLASH LipidoMix standard solution used for normalisation.

| Lipid Standard                     | Adduct                                               | Polarity | m/z      | RT (min) |
|------------------------------------|------------------------------------------------------|----------|----------|----------|
| ChE 18:1(d <sub>7</sub> )          | [M+NH <sub>4</sub> ] <sup>+</sup>                    | +        | 675.6772 | 14.50    |
| DG 15:0-18:1(d <sub>7</sub> )      | [M+NH <sub>4</sub> ] <sup>+</sup>                    | +        | 605.5837 | 9.70     |
|                                    | [M-H+CH <sub>3</sub> CO <sub>2</sub> H] <sup>-</sup> | -        | 646.5637 | 9.70     |
| LPC 18:1(d <sub>7</sub> )          | [M+H] <sup>+</sup>                                   | +        | 529.3986 | 5.61     |
|                                    | [M-H+CH <sub>3</sub> CO <sub>2</sub> H] <sup>-</sup> | -        | 587.4052 | 5.61     |
| LPE 18:1(d <sub>7</sub> )          | [M+H] <sup>+</sup>                                   | +        | 487.3517 | 5.74     |
|                                    | [M-H] <sup>-</sup>                                   | -        | 485.3371 | 5.74     |
| MG 18:1(d <sub>7</sub> )           | [M+NH <sub>4</sub> ] <sup>+</sup>                    | +        | 381.3697 | 6.82     |
|                                    | [M-H+CH <sub>3</sub> CO <sub>2</sub> H] <sup>-</sup> | -        | 422.3497 | 6.82     |
| PA 15:0-18:1(d <sub>7</sub> )      | [M+NH <sub>4</sub> ] <sup>+</sup>                    | +        | 685.5500 | 9.16     |
|                                    | [M-H] <sup>-</sup>                                   | -        | 666.5089 | 9.16     |
| PC 15:0-18:1(d <sub>7</sub> )      | [M+H] <sup>+</sup>                                   | +        | 753.6126 | 8.99     |
|                                    | [M-H+CH <sub>3</sub> CO <sub>2</sub> H] <sup>-</sup> | -        | 811.6192 | 8.99     |
| PE 15:0-18:1(d <sub>7</sub> )      | [M+H] <sup>+</sup>                                   | +        | 711.5657 | 9.04     |
|                                    | [M-H] <sup>-</sup>                                   | -        | 709.5511 | 9.04     |
| PG 15:0-18:1(d <sub>7</sub> )      | [M+NH <sub>4</sub> ] <sup>+</sup>                    | +        | 759.5868 | 8.66     |
|                                    | [2M-H] <sup>-</sup>                                  | -        | 1482.099 | 8.66     |
| PI 15:0-18:1(d <sub>7</sub> )      | [M+H] <sup>+</sup>                                   | +        | 830.5763 | 8.58     |
|                                    | [M-H] <sup>-</sup>                                   | -        | 828.5618 | 8.57     |
| PS 15:0-18:1(d <sub>7</sub> )      | [M+H] <sup>+</sup>                                   | +        | 755.5555 | 8.78     |
|                                    | [M-H] <sup>-</sup>                                   | +        | 753.5410 | 8.78     |
| SM d18:1-18:1(d <sub>9</sub> )     | [M+H] <sup>+</sup>                                   | +        | 738.646  | 8.82     |
|                                    | [M+NH <sub>4</sub> ] <sup>+</sup>                    | +        | 829.7977 | 13.09    |
| TG 15:0-18:1(d <sub>7</sub> )-15:0 |                                                      |          |          |          |

**Table S4.** Lipid ions identified in *P. pastoris* and their <sup>13</sup>C-enrichment based on their labelling pattern and the labelling percentage of the fully labelled isotopologues.

| Number | Lipid ion ID                  | Class | Number of carbon atom in the ion | Polarity | Labelling percentage of fully labelled ions | Expected <sup>13</sup> C-labelling degree based on the fully labelling percentage obtained |
|--------|-------------------------------|-------|----------------------------------|----------|---------------------------------------------|--------------------------------------------------------------------------------------------|
| 1      | Cer(d17:0/16:0)+H             | Cer   | 33                               | +        | 0.00                                        | 0.00                                                                                       |
| 2      | Cer(d17:0/18:0)+H             | Cer   | 35                               | +        | 0.00                                        | 0.00                                                                                       |
| 3      | Cer(d18:0/18:0)+H             | Cer   | 36                               | +        | 68.99                                       | 98.97                                                                                      |
| 4      | Cer(d18:0/18:0)-H             | Cer   | 36                               | -        | 74.95                                       | 99.20                                                                                      |
| 5      | Cer(d18:1/16:0)+H             | Cer   | 34                               | +        | 72.16                                       | 99.04                                                                                      |
| 6      | Cer(d18:1/18:0)+H             | Cer   | 36                               | +        | 67.49                                       | 98.91                                                                                      |
| 7      | Cer(d18:1/28:5)+H             | Cer   | 46                               | +        | 59.71                                       | 98.89                                                                                      |
| 8      | Cer(d18:2/16:0)+H             | Cer   | 34                               | +        | 68.10                                       | 98.88                                                                                      |
| 9      | Cer(d18:2/16:0+O)+H           | Cer   | 34                               | +        | 73.76                                       | 99.11                                                                                      |
| 10     | Cer(d18:2/16:0+O)-H           | Cer   | 34                               | -        | 56.83                                       | 98.35                                                                                      |
| 11     | Cer(d18:2/18:0)+H             | Cer   | 36                               | +        | 66.00                                       | 98.85                                                                                      |
| 12     | Cer(d18:2/18:0+O)+H           | Cer   | 36                               | +        | 61.05                                       | 98.64                                                                                      |
| 13     | Cer(d18:2/18:0+O)-H           | Cer   | 36                               | -        | 60.28                                       | 98.60                                                                                      |
| 14     | Cer(d24:0/18:0+O)+H           | Cer   | 42                               | +        | 53.92                                       | 98.54                                                                                      |
| 15     | Cer(d24:1)-H                  | Cer   | 24                               | -        | 0.00                                        | 0.00                                                                                       |
| 16     | CerG1(d18:2/16:0+O)+H         | CerG1 | 40                               | +        | 63.71                                       | 98.88                                                                                      |
| 17     | CerG1(d18:2/18:0+O)+H         | CerG1 | 42                               | +        | 59.28                                       | 98.76                                                                                      |
| 18     | CerG1(d18:2/18:1)+H           | CerG1 | 42                               | +        | 63.43                                       | 98.92                                                                                      |
| 19     | DG(15:0/18:2)+NH <sub>4</sub> | DG    | 36                               | +        | 68.15                                       | 98.94                                                                                      |
| 20     | DG(16:0/14:0)+NH <sub>4</sub> | DG    | 33                               | +        | 0.19                                        | 82.71                                                                                      |
| 21     | DG(16:0/16:0)+H               | DG    | 35                               | +        | 0.00                                        | 0.00                                                                                       |

|    |                                |       |    |   |       |       |
|----|--------------------------------|-------|----|---|-------|-------|
| 22 | DG(16:0/16:0)+ NH <sub>4</sub> | DG    | 35 | + | 0.05  | 80.26 |
| 23 | DG(16:0/17:0)+ NH <sub>4</sub> | DG    | 36 | + | 0.00  | 0.00  |
| 24 | DG(16:0/18:1)+ NH <sub>4</sub> | DG    | 37 | + | 66.08 | 98.89 |
| 25 | DG(16:1/16:1)+ NH <sub>4</sub> | DG    | 35 | + | 69.35 | 98.96 |
| 26 | DG(16:1/18:1)+ NH <sub>4</sub> | DG    | 37 | + | 65.74 | 98.87 |
| 27 | DG(16:1/18:2)+ NH <sub>4</sub> | DG    | 37 | + | 66.28 | 98.89 |
| 28 | DG(16:1/18:3)+ NH <sub>4</sub> | DG    | 37 | + | 66.51 | 98.90 |
| 29 | DG(17:0/18:1)+ NH <sub>4</sub> | DG    | 38 | + | 65.99 | 98.91 |
| 30 | DG(17:1/18:1)+ NH <sub>4</sub> | DG    | 38 | + | 65.86 | 98.91 |
| 31 | DG(17:1/18:2)+ NH <sub>4</sub> | DG    | 38 | + | 64.67 | 98.86 |
| 32 | DG(17:1/18:3)+ NH <sub>4</sub> | DG    | 38 | + | 60.47 | 98.69 |
| 33 | DG(18:0/16:0)+H                | DG    | 37 | + | 0.00  | 0.00  |
| 34 | DG(18:0/16:0)+ NH <sub>4</sub> | DG    | 37 | + | 0.03  | 80.16 |
| 35 | DG(18:0/16:0)+ NH <sub>4</sub> | DG    | 37 | + | 0.00  | 0.00  |
| 36 | DG(18:0/17:0)+ NH <sub>4</sub> | DG    | 38 | + | 0.31  | 85.87 |
| 37 | DG(18:0/18:0)+H                | DG    | 39 | + | 0.00  | 0.00  |
| 38 | DG(18:0/18:1)+ NH <sub>4</sub> | DG    | 39 | + | 61.15 | 98.75 |
| 39 | DG(18:0/20:0)+ NH <sub>4</sub> | DG    | 41 | + | 0.12  | 84.84 |
| 40 | DG(18:1/14:0)+ NH <sub>4</sub> | DG    | 35 | + | 69.65 | 98.97 |
| 41 | DG(18:1/18:1)+H                | DG    | 39 | + | 62.23 | 98.79 |
| 42 | DG(18:1/18:1)+ NH <sub>4</sub> | DG    | 39 | + | 65.19 | 98.91 |
| 43 | DG(18:1/18:2)+ NH <sub>4</sub> | DG    | 39 | + | 64.55 | 98.88 |
| 44 | DG(18:1/19:4)+H                | DG    | 40 | + | 0.00  | 0.00  |
| 45 | DG(18:1/24:0)+ NH <sub>4</sub> | DG    | 45 | + | 56.02 | 98.72 |
| 46 | DG(18:2/17:3)+ NH <sub>4</sub> | DG    | 38 | + | 65.96 | 98.91 |
| 47 | DG(18:2/18:2)+ NH <sub>4</sub> | DG    | 39 | + | 63.39 | 98.84 |
| 48 | DG(18:3/18:2)+H                | DG    | 39 | + | 0.22  | 85.51 |
| 49 | DG(18:3/18:2)+ NH <sub>4</sub> | DG    | 39 | + | 63.43 | 98.84 |
| 50 | DG(18:3/18:3)+H                | DG    | 39 | + | 0.00  | 0.00  |
| 51 | DG(18:3/18:3)+ NH <sub>4</sub> | DG    | 39 | + | 61.35 | 98.76 |
| 52 | DG(20:1/18:2)+ NH <sub>4</sub> | DG    | 41 | + | 42.30 | 97.92 |
| 53 | DG(20:1/18:3)+ NH <sub>4</sub> | DG    | 41 | + | 58.38 | 98.70 |
| 54 | DG(37:4)+H                     | DG    | 40 | + | 0.00  | 0.00  |
| 55 | dMePE(16:0/18:1)-H             | dMePE | 41 | - | 67.25 | 99.04 |
| 56 | dMePE(16:0/18:2)-H             | dMePE | 41 | - | 66.30 | 99.00 |
| 57 | dMePE(16:2/18:2)-H             | dMePE | 41 | - | 61.74 | 98.83 |
| 58 | dMePE(18:1/18:1)-H             | dMePE | 43 | - | 57.62 | 98.73 |
| 59 | dMePE(18:1/18:2)-H             | dMePE | 43 | - | 59.13 | 98.79 |
| 60 | dMePE(18:1/18:3)-H             | dMePE | 43 | - | 42.32 | 98.02 |
| 61 | dMePE(18:3/18:2)-H             | dMePE | 43 | - | 62.63 | 98.92 |
| 62 | dMePE(33:2)-H                  | dMePE | 40 | - | 62.38 | 98.83 |
| 63 | dMePE(35:2)-H                  | dMePE | 42 | - | 27.78 | 97.00 |
| 64 | FA(18:2)-H                     | FA    | 18 | - | 81.27 | 98.85 |
| 65 | LPC(16:0)+CH <sub>3</sub> COO  | LPC   | 24 | - | 70.67 | 98.56 |
| 66 | LPC(16:0)+H                    | LPC   | 24 | + | 75.42 | 98.83 |
| 67 | LPC(16:1)+H                    | LPC   | 24 | + | 73.20 | 98.71 |
| 68 | LPC(17:1)+H                    | LPC   | 25 | + | 70.65 | 98.62 |
| 69 | LPC(18:0)+H                    | LPC   | 26 | + | 75.68 | 98.93 |
| 70 | LPC(18:1)+H                    | LPC   | 26 | + | 71.68 | 98.73 |
| 71 | LPC(18:2)+H                    | LPC   | 26 | + | 74.85 | 98.89 |
| 72 | LPC(18:3)+H                    | LPC   | 26 | + | 71.73 | 98.73 |
| 73 | LPC(20:5)+H                    | LPC   | 28 | + | 0.00  | 0.00  |
| 74 | LPC(37:6)+H                    | LPC   | 45 | + | 0.00  | 0.00  |
| 75 | LPE(16:0)-H                    | LPE   | 21 | - | 77.04 | 98.77 |
| 76 | LPE(18:1)-H                    | LPE   | 23 | - | 74.95 | 98.75 |
| 77 | LPE(18:2)+H                    | LPE   | 23 | + | 0.00  | 0.00  |
| 78 | LPE(18:2)-H                    | LPE   | 23 | - | 73.84 | 98.69 |
| 79 | LPE(18:3)+H                    | LPE   | 23 | + | 81.58 | 99.12 |



|     |                           |       |    |   |       |       |
|-----|---------------------------|-------|----|---|-------|-------|
| 80  | LPE(18:3)-H               | LPE   | 23 | - | 75.42 | 98.78 |
| 81  | MG(14:0)+H                | MG    | 17 | + | 0.00  | 0.00  |
| 82  | MG(14:0)+ NH <sub>4</sub> | MG    | 17 | + | 0.00  | 0.00  |
| 83  | MG(16:0)+H                | MG    | 19 | + | 0.00  | 0.00  |
| 84  | MG(16:0)+ NH <sub>4</sub> | MG    | 19 | + | 0.00  | 0.00  |
| 85  | MG(16:0)+ NH <sub>4</sub> | MG    | 19 | + | 0.00  | 0.00  |
| 86  | MG(18:0)+H                | MG    | 21 | + | 0.00  | 0.00  |
| 87  | MG(18:0)+H                | MG    | 21 | + | 0.00  | 0.00  |
| 88  | MG(18:0)+ NH <sub>4</sub> | MG    | 21 | + | 0.00  | 0.00  |
| 89  | MG(18:0)+ NH <sub>4</sub> | MG    | 21 | + | 0.00  | 0.00  |
| 90  | MG(18:0)+ NH <sub>4</sub> | MG    | 21 | + | 0.00  | 0.00  |
| 91  | OAHFA(32:1)-H             | OAHFA | 32 | - | 65.32 | 98.68 |
| 92  | OAHFA(36:1)-H             | OAHFA | 36 | - | 62.48 | 98.70 |
| 93  | OAHFA(36:3)-H             | OAHFA | 36 | - | 66.16 | 98.86 |
| 94  | OAHFA(38:6)-H             | OAHFA | 38 | - | 0.00  | 0.00  |
| 95  | PA(16:0/18:1)-H           | PA    | 37 | - | 61.20 | 98.68 |
| 96  | PA(16:0/18:2)-H           | PA    | 37 | - | 71.50 | 99.10 |
| 97  | PA(16:0/18:2)-H           | PA    | 37 | - | 66.79 | 98.91 |
| 98  | PA(18:1/18:1)-H           | PA    | 39 | - | 68.40 | 99.03 |
| 99  | PA(18:1/18:2)-H           | PA    | 39 | - | 68.01 | 99.02 |
| 100 | PA(18:3/18:2)-H           | PA    | 39 | - | 68.09 | 99.02 |
| 101 | PC(15:2/18:2)+H           | PC    | 41 | + | 64.95 | 98.95 |
| 102 | PC(16:0/18:1)+H           | PC    | 42 | + | 59.86 | 98.79 |
| 103 | PC(18:1/19:2)+H           | PC    | 45 | + | 58.22 | 98.80 |
| 104 | PC(30:1)+H                | PC    | 38 | + | 64.31 | 98.84 |
| 105 | PC(32:0)+H                | PC    | 40 | + | 68.47 | 99.06 |
| 106 | PC(32:1)+H                | PC    | 40 | + | 64.98 | 98.93 |
| 107 | PC(32:2)+H                | PC    | 40 | + | 62.62 | 98.84 |
| 108 | PC(32:3)+H                | PC    | 40 | + | 60.84 | 98.77 |
| 109 | PC(32:4)+H                | PC    | 40 | + | 62.52 | 98.83 |
| 110 | PC(33:1)+H                | PC    | 41 | + | 65.17 | 98.96 |
| 111 | PC(33:3)+H                | PC    | 41 | + | 59.94 | 98.76 |
| 112 | PC(33:4)+H                | PC    | 41 | + | 58.93 | 98.72 |
| 113 | PC(33:5)+H                | PC    | 41 | + | 65.64 | 98.98 |
| 114 | PC(34:2)+H                | PC    | 42 | + | 59.62 | 98.78 |
| 115 | PC(34:3)+H                | PC    | 42 | + | 59.50 | 98.77 |
| 116 | PC(34:4)+H                | PC    | 42 | + | 58.66 | 98.74 |
| 117 | PC(34:5)+H                | PC    | 42 | + | 59.42 | 98.77 |
| 118 | PC(34:6)+H                | PC    | 42 | + | 60.85 | 98.82 |
| 119 | PC(35:1)+H                | PC    | 43 | + | 63.66 | 98.96 |
| 120 | PC(35:3)+H                | PC    | 43 | + | 0.00  | 0.00  |
| 121 | PC(35:4)+H                | PC    | 43 | + | 57.08 | 98.70 |
| 122 | PC(35:5)+H                | PC    | 43 | + | 57.43 | 98.72 |
| 123 | PC(35:6)+H                | PC    | 43 | + | 56.04 | 98.66 |
| 124 | PC(36:1)+H                | PC    | 44 | + | 56.15 | 98.70 |
| 125 | PC(36:2)+H                | PC    | 44 | + | 57.38 | 98.75 |
| 126 | PC(36:3)+H                | PC    | 44 | + | 58.42 | 98.79 |
| 127 | PC(36:3)+H                | PC    | 44 | + | 62.65 | 98.94 |
| 128 | PC(36:4)+H                | PC    | 44 | + | 57.91 | 98.77 |
| 129 | PC(36:5)+H                | PC    | 44 | + | 56.81 | 98.72 |
| 130 | PC(36:6)+H                | PC    | 44 | + | 56.12 | 98.70 |
| 131 | PC(36:7)+H                | PC    | 44 | + | 0.00  | 0.00  |
| 132 | PC(37:2)+H                | PC    | 45 | + | 44.07 | 98.20 |
| 133 | PC(37:4)+H                | PC    | 45 | + | 54.74 | 98.67 |
| 134 | PC(38:2)+H                | PC    | 46 | + | 57.23 | 98.79 |
| 135 | PC(38:3)+H                | PC    | 46 | + | 57.06 | 98.79 |
| 136 | PC(38:4)+H                | PC    | 46 | + | 55.96 | 98.75 |
| 137 | PC(38:5)+H                | PC    | 46 | + | 50.57 | 98.53 |

|     |                                |    |    |   |       |       |
|-----|--------------------------------|----|----|---|-------|-------|
| 138 | PC(38:6)+H                     | PC | 46 | + | 47.08 | 98.38 |
| 139 | PE(16:0/16:0)+H                | PE | 37 | + | 71.28 | 99.09 |
| 140 | PE(16:0/16:1)+H                | PE | 37 | + | 64.89 | 98.84 |
| 141 | PE(16:0/18:1)+H                | PE | 39 | + | 65.37 | 98.92 |
| 142 | PE(16:0/18:1)-H                | PE | 39 | - | 63.79 | 98.85 |
| 143 | PE(16:0/18:3)+H                | PE | 39 | + | 65.32 | 98.91 |
| 144 | PE(16:0/18:3)-H                | PE | 39 | - | 64.04 | 98.86 |
| 145 | PE(16:0e)+H                    | PE | 21 | + | 81.76 | 99.05 |
| 146 | PE(16:1/16:1)+H                | PE | 37 | + | 64.72 | 98.83 |
| 147 | PE(16:1/16:1)-H                | PE | 37 | - | 61.63 | 98.70 |
| 148 | PE(16:1/18:1)-H                | PE | 39 | - | 63.60 | 98.85 |
| 149 | PE(16:1/18:3)+H                | PE | 39 | + | 64.17 | 98.87 |
| 150 | PE(16:1/18:3)-H                | PE | 39 | - | 63.03 | 98.82 |
| 151 | PE(16:2/18:3)+H                | PE | 39 | + | 65.42 | 98.92 |
| 152 | PE(17:0/18:1)+H                | PE | 40 | + | 58.21 | 98.66 |
| 153 | PE(17:1/16:0)-H                | PE | 38 | - | 68.55 | 99.01 |
| 154 | PE(17:1/18:1)+H                | PE | 40 | + | 62.77 | 98.84 |
| 155 | PE(17:1/18:1)-H                | PE | 40 | - | 62.38 | 98.83 |
| 156 | PE(17:1/18:2)+H                | PE | 40 | + | 63.00 | 98.85 |
| 157 | PE(18:0/18:1)+H                | PE | 41 | + | 66.80 | 99.02 |
| 158 | PE(18:0/18:1)-H                | PE | 41 | - | 66.74 | 99.02 |
| 159 | PE(18:0p)+H                    | PE | 23 | + | 94.42 | 99.75 |
| 160 | PE(18:1/18:1)+H                | PE | 41 | + | 64.53 | 98.94 |
| 161 | PE(18:1/18:1)-H                | PE | 41 | - | 63.07 | 98.88 |
| 162 | PE(18:1/18:2)+H                | PE | 41 | + | 65.17 | 98.96 |
| 163 | PE(18:1/18:2)-H                | PE | 41 | - | 62.13 | 98.85 |
| 164 | PE(18:2/17:2)-H                | PE | 40 | - | 61.25 | 98.78 |
| 165 | PE(18:2/17:3)+H                | PE | 40 | + | 61.95 | 98.81 |
| 166 | PE(18:2/17:3)-H                | PE | 40 | - | 60.45 | 98.75 |
| 167 | PE(18:2/18:2)+H                | PE | 41 | + | 64.95 | 98.95 |
| 168 | PE(18:2/18:2)-H                | PE | 41 | - | 61.74 | 98.83 |
| 169 | PE(18:3/18:2)+H                | PE | 41 | + | 63.60 | 98.90 |
| 170 | PE(18:3/18:2)-H                | PE | 41 | - | 59.06 | 98.72 |
| 171 | PE(18:3/18:3)+H                | PE | 41 | + | 60.89 | 98.80 |
| 172 | PE(18:3/18:3)-H                | PE | 41 | - | 58.57 | 98.70 |
| 173 | PE(32:1e)+H                    | PE | 37 | + | 91.11 | 99.75 |
| 174 | PE(34:0e)+H                    | PE | 39 | + | 0.00  | 0.00  |
| 175 | PE(35:4)+H                     | PE | 40 | + | 66.58 | 98.99 |
| 176 | PE(37:0p)+H                    | PE | 42 | + | 50.96 | 98.41 |
| 177 | PE(37:1p)+H                    | PE | 42 | + | 62.33 | 98.88 |
| 178 | PE(37:2)-H                     | PE | 42 | - | 27.78 | 97.00 |
| 179 | PE(37:5)-H                     | PE | 42 | - | 25.88 | 96.83 |
| 180 | PE(42:2p)+H                    | PE | 47 | + | 53.74 | 98.69 |
| 181 | PE(43:10)+H                    | PE | 48 | + | 0.00  | 0.00  |
| 182 | PE(45:11)+H                    | PE | 50 | + | 0.00  | 0.00  |
| 183 | PE(45:12)+H                    | PE | 50 | + | 0.00  | 0.00  |
| 184 | PE(45:13)+H                    | PE | 50 | + | 0.00  | 0.00  |
| 185 | PE(47:10)+H                    | PE | 52 | + | 0.00  | 0.00  |
| 186 | PE(47:12)+H                    | PE | 52 | + | 0.00  | 0.00  |
| 187 | PE(47:13)+H                    | PE | 52 | + | 0.00  | 0.00  |
| 188 | PG(16:0/18:1)+ NH <sub>4</sub> | PG | 40 | + | 66.22 | 98.97 |
| 189 | PG(16:0/18:1)-H                | PG | 40 | - | 69.19 | 99.08 |
| 190 | PG(16:0/18:2)+ NH <sub>4</sub> | PG | 40 | + | 66.72 | 98.99 |
| 191 | PG(16:0/18:2)-H                | PG | 40 | - | 63.59 | 98.87 |
| 192 | PG(16:0/18:3)-H                | PG | 40 | - | 65.63 | 98.95 |
| 193 | PG(18:1/18:2)-H                | PG | 42 | - | 62.58 | 98.89 |
| 194 | PG(18:1/18:3)-H                | PG | 42 | - | 62.48 | 98.89 |
| 195 | PG(18:3/18:2)-H                | PG | 42 | - | 62.12 | 98.87 |

|     |                                     |    |    |   |       |       |
|-----|-------------------------------------|----|----|---|-------|-------|
| 196 | PG(28:0/16:0)+H                     | PG | 50 | + | 0.00  | 0.00  |
| 197 | PG(28:0/18:1)+H                     | PG | 52 | + | 0.00  | 0.00  |
| 198 | PG(28:0/18:2)+H                     | PG | 52 | + | 0.00  | 0.00  |
| 199 | PI(16:0/16:1)+ NH <sub>4</sub>      | PI | 41 | + | 66.56 | 99.01 |
| 200 | PI(16:0/16:1)-H                     | PI | 41 | - | 63.51 | 98.90 |
| 201 | PI(16:0/18:1)+H                     | PI | 43 | + | 61.05 | 98.86 |
| 202 | PI(16:0/18:2)+H                     | PI | 43 | + | 63.66 | 98.96 |
| 203 | PI(16:0/18:2)+ NH <sub>4</sub>      | PI | 43 | + | 63.75 | 98.96 |
| 204 | PI(16:0/18:2)-H                     | PI | 43 | - | 60.84 | 98.85 |
| 205 | PI(16:0/18:3)+ NH <sub>4</sub>      | PI | 43 | + | 63.54 | 98.95 |
| 206 | PI(16:0/18:3)-H                     | PI | 43 | - | 60.81 | 98.85 |
| 207 | PI(16:1/18:3)-H                     | PI | 43 | - | 59.03 | 98.78 |
| 208 | PI(17:0/18:1)-H                     | PI | 44 | - | 59.21 | 98.82 |
| 209 | PI(17:1/16:0)-H                     | PI | 42 | - | 61.97 | 98.87 |
| 210 | PI(17:1/18:1)-H                     | PI | 44 | - | 59.49 | 98.83 |
| 211 | PI(18:0/18:1)+ NH <sub>4</sub>      | PI | 45 | + | 64.18 | 99.02 |
| 212 | PI(18:0/18:1)-H                     | PI | 45 | - | 58.55 | 98.82 |
| 213 | PI(18:1/18:1)-H                     | PI | 45 | - | 59.66 | 98.86 |
| 214 | PI(18:1/18:2)-H                     | PI | 45 | - | 58.60 | 98.82 |
| 215 | PI(18:2/18:2)+ NH <sub>4</sub>      | PI | 45 | + | 59.15 | 98.84 |
| 216 | PI(18:2/18:2)-H                     | PI | 45 | - | 58.05 | 98.80 |
| 217 | PI(18:3/18:3)+ NH <sub>4</sub>      | PI | 45 | + | 64.73 | 99.04 |
| 218 | PI(18:3/18:3)-H                     | PI | 45 | - | 59.31 | 98.85 |
| 219 | PI(36:3)+NH <sub>4</sub>            | PI | 45 | + | 59.70 | 98.86 |
| 220 | PS(16:0/16:1)-H                     | PS | 38 | - | 48.72 | 98.13 |
| 221 | PS(16:0/18:1)+H                     | PS | 40 | + | 68.79 | 99.07 |
| 222 | PS(16:0/18:1)-H                     | PS | 40 | - | 69.38 | 99.09 |
| 223 | PS(16:0/18:2)-H                     | PS | 40 | - | 62.82 | 98.84 |
| 224 | PS(16:0/18:3)-H                     | PS | 40 | - | 63.38 | 98.87 |
| 225 | PS(18:1/18:1)-H                     | PS | 42 | - | 64.63 | 98.97 |
| 226 | PS(18:1/18:2)-H                     | PS | 42 | - | 70.00 | 99.15 |
| 227 | PS(36:1)-H                          | PS | 42 | - | 1.38  | 90.31 |
| 228 | PS(36:4)-H                          | PS | 42 | - | 0.00  | 0.00  |
| 229 | PS(36:4)-H                          | PS | 42 | - | 0.00  | 0.00  |
| 230 | PS(37:3)-H                          | PS | 43 | - | 0.00  | 0.00  |
| 231 | PS(37:4)-H                          | PS | 43 | - | 0.00  | 0.00  |
| 232 | PS(38:1p)-H                         | PS | 44 | - | 68.99 | 99.16 |
| 233 | PS(39:4)-H                          | PS | 45 | - | 0.00  | 0.00  |
| 234 | PS(39:6)-H                          | PS | 45 | - | 6.45  | 94.09 |
| 235 | PS(40:1)-H                          | PS | 46 | - | 1.05  | 90.56 |
| 236 | PS(40:4)-H                          | PS | 46 | - | 1.11  | 90.68 |
| 237 | PS(40:5)-H                          | PS | 46 | - | 1.06  | 90.59 |
| 238 | PS(42:1)-H                          | PS | 48 | - | 0.00  | 0.00  |
| 239 | SM(d41:5)+H                         | SM | 46 | + | 0.00  | 0.00  |
| 240 | So(d17:1)+H                         | So | 17 | + | 0.00  | 0.00  |
| 241 | So(d18:0)+H                         | So | 18 | + | 84.08 | 99.04 |
| 242 | So(d18:1)+H                         | So | 18 | + | 79.99 | 98.77 |
| 243 | So(d20:0)+H                         | So | 20 | + | 73.85 | 98.50 |
| 244 | So(d20:1)+H                         | So | 20 | + | 78.68 | 98.81 |
| 245 | TG(12:0/18:2/18:2)+NH <sub>4</sub>  | TG | 51 | + | 53.47 | 98.78 |
| 246 | TG(12:0/18:2/20:5)+H                | TG | 53 | + | 0.00  | 0.00  |
| 247 | TG(14:0/18:3/20:4)+H                | TG | 55 | + | 0.00  | 0.00  |
| 248 | TG(15:0/16:0/18:1)+ NH <sub>4</sub> | TG | 52 | + | 54.34 | 98.83 |
| 249 | TG(15:0/16:0/18:2)+ NH <sub>4</sub> | TG | 52 | + | 55.17 | 98.86 |
| 250 | TG(15:0/16:1/18:3)+ NH <sub>4</sub> | TG | 52 | + | 50.97 | 98.71 |
| 251 | TG(16:0/14:0/16:0)+ NH <sub>4</sub> | TG | 49 | + | 5.48  | 94.24 |
| 252 | TG(16:0/14:0/18:1)+ NH <sub>4</sub> | TG | 51 | + | 57.73 | 98.93 |
| 253 | TG(16:0/14:0/20:4)+H                | TG | 53 | + | 0.00  | 0.00  |

|     |                                     |    |    |   |       |       |
|-----|-------------------------------------|----|----|---|-------|-------|
| 254 | TG(16:0/16:0/16:0)+ NH <sub>4</sub> | TG | 51 | + | 1.41  | 91.99 |
| 255 | TG(16:0/16:0/18:1)+ NH <sub>4</sub> | TG | 53 | + | 56.21 | 98.92 |
| 256 | TG(16:0/16:0/18:3)+H                | TG | 53 | + | 0.00  | 0.00  |
| 257 | TG(16:0/16:1/18:1)+ NH <sub>4</sub> | TG | 53 | + | 55.08 | 98.88 |
| 258 | TG(16:0/16:1/18:2)+ NH <sub>4</sub> | TG | 53 | + | 54.90 | 98.88 |
| 259 | TG(16:0/17:0/18:1)+ NH <sub>4</sub> | TG | 54 | + | 54.35 | 98.88 |
| 260 | TG(16:0/17:1/18:1)+ NH <sub>4</sub> | TG | 54 | + | 54.71 | 98.89 |
| 261 | TG(16:0/17:1/20:4)+H                | TG | 56 | + | 1.02  | 92.14 |
| 262 | TG(16:0/18:1/18:1)+ NH <sub>4</sub> | TG | 55 | + | 54.06 | 98.89 |
| 263 | TG(16:0/18:1/20:4)+H                | TG | 57 | + | 0.00  | 0.00  |
| 264 | TG(16:0/18:2/18:3)+ NH <sub>4</sub> | TG | 55 | + | 50.82 | 98.78 |
| 265 | TG(16:0/20:5/20:5)+H                | TG | 59 | + | 0.10  | 88.96 |
| 266 | TG(16:1/12:0/18:1)+ NH <sub>4</sub> | TG | 49 | + | 59.05 | 98.93 |
| 267 | TG(16:1/14:0/17:1)+ NH <sub>4</sub> | TG | 50 | + | 56.16 | 98.85 |
| 268 | TG(16:1/14:0/18:1)+ NH <sub>4</sub> | TG | 51 | + | 57.83 | 98.93 |
| 269 | TG(16:1/16:1/16:1)+ NH <sub>4</sub> | TG | 51 | + | 55.54 | 98.85 |
| 270 | TG(16:1/16:1/17:1)+ NH <sub>4</sub> | TG | 52 | + | 53.89 | 98.82 |
| 271 | TG(16:1/16:1/18:2)+ NH <sub>4</sub> | TG | 53 | + | 54.04 | 98.85 |
| 272 | TG(16:1/16:1/18:3)+ NH <sub>4</sub> | TG | 53 | + | 52.65 | 98.80 |
| 273 | TG(16:1/16:2/18:3)+ NH <sub>4</sub> | TG | 53 | + | 47.29 | 98.60 |
| 274 | TG(16:1/17:1/18:1)+ NH <sub>4</sub> | TG | 54 | + | 54.40 | 98.88 |
| 275 | TG(16:1/17:1/18:2)+ NH <sub>4</sub> | TG | 54 | + | 52.89 | 98.83 |
| 276 | TG(16:1/17:3/18:2)+ NH <sub>4</sub> | TG | 54 | + | 48.34 | 98.66 |
| 277 | TG(16:1/17:3/18:3)+ NH <sub>4</sub> | TG | 54 | + | 46.18 | 98.58 |
| 278 | TG(16:1/18:1/18:1)+ NH <sub>4</sub> | TG | 55 | + | 53.47 | 98.87 |
| 279 | TG(16:1/18:1/18:2)+ NH <sub>4</sub> | TG | 55 | + | 52.73 | 98.84 |
| 280 | TG(16:1/18:1/18:3)+H                | TG | 55 | + | 0.00  | 0.00  |
| 281 | TG(16:1/18:2/18:3)+ NH <sub>4</sub> | TG | 55 | + | 50.32 | 98.76 |
| 282 | TG(16:1/18:2/20:5)+H                | TG | 57 | + | 0.00  | 0.00  |
| 283 | TG(16:1/18:3/18:3)+ NH <sub>4</sub> | TG | 55 | + | 48.32 | 98.69 |
| 284 | TG(16:2/18:3/18:3)+ NH <sub>4</sub> | TG | 55 | + | 49.27 | 98.72 |
| 285 | TG(17:0/18:1/18:1)+ NH <sub>4</sub> | TG | 56 | + | 53.25 | 98.88 |
| 286 | TG(17:1/17:2/17:2)+ NH <sub>4</sub> | TG | 54 | + | 50.02 | 98.73 |
| 287 | TG(17:4/18:3/21:5)+H                | TG | 59 | + | 0.00  | 0.00  |
| 288 | TG(18:0/16:0/16:0)+ NH <sub>4</sub> | TG | 53 | + | 0.33  | 89.78 |
| 289 | TG(18:0/16:0/18:0)+ NH <sub>4</sub> | TG | 55 | + | 0.06  | 87.50 |
| 290 | TG(18:0/16:0/18:1)+ NH <sub>4</sub> | TG | 55 | + | 55.30 | 98.93 |
| 291 | TG(18:0/16:1/18:1)+ NH <sub>4</sub> | TG | 55 | + | 54.06 | 98.89 |
| 292 | TG(18:0/18:0/18:0)+ NH <sub>4</sub> | TG | 57 | + | 0.00  | 0.00  |
| 293 | TG(18:0/18:0/18:1)+ NH <sub>4</sub> | TG | 57 | + | 51.06 | 98.83 |
| 294 | TG(18:0/18:1/18:1)+ NH <sub>4</sub> | TG | 57 | + | 53.09 | 98.90 |
| 295 | TG(18:0/18:1/18:2)+ NH <sub>4</sub> | TG | 57 | + | 52.89 | 98.89 |
| 296 | TG(18:0/18:1/20:4)+H                | TG | 59 | + | 0.00  | 0.00  |
| 297 | TG(18:1/14:0/14:0)+ NH <sub>4</sub> | TG | 49 | + | 65.05 | 99.13 |
| 298 | TG(18:1/17:1/18:1)+ NH <sub>4</sub> | TG | 56 | + | 52.89 | 98.87 |
| 299 | TG(18:1/17:1/18:2)+ NH <sub>4</sub> | TG | 56 | + | 52.67 | 98.86 |
| 300 | TG(18:1/17:1/20:5)+H                | TG | 58 | + | 0.81  | 92.04 |
| 301 | TG(18:1/18:1/18:2)+ NH <sub>4</sub> | TG | 57 | + | 52.43 | 98.87 |
| 302 | TG(18:1/18:1/19:2)+ NH <sub>4</sub> | TG | 58 | + | 50.74 | 98.84 |
| 303 | TG(18:1/18:1/19:3)+H                | TG | 58 | + | 0.00  | 0.00  |
| 304 | TG(18:1/18:1/19:5)+ NH <sub>4</sub> | TG | 58 | + | 0.64  | 91.66 |
| 305 | TG(18:1/18:2/18:2)+ NH <sub>4</sub> | TG | 57 | + | 50.10 | 98.79 |
| 306 | TG(18:1/18:2/18:3)+H                | TG | 57 | + | 0.00  | 0.00  |
| 307 | TG(18:1/18:2/18:3)+ NH <sub>4</sub> | TG | 57 | + | 49.27 | 98.77 |
| 308 | TG(18:1/18:2/20:3)+ NH <sub>4</sub> | TG | 59 | + | 48.49 | 98.78 |
| 309 | TG(18:1/18:2/22:0)+ NH <sub>4</sub> | TG | 61 | + | 50.57 | 98.89 |
| 310 | TG(18:1/18:3/18:3)+H                | TG | 57 | + | 0.00  | 0.00  |
| 311 | TG(18:1/18:3/19:5)+ NH <sub>4</sub> | TG | 58 | + | 0.00  | 0.00  |

|     |                                     |    |    |   |       |       |
|-----|-------------------------------------|----|----|---|-------|-------|
| 312 | TG(18:1/18:3/22:0)+ NH <sub>4</sub> | TG | 61 | + | 47.34 | 98.78 |
| 313 | TG(18:1/18:3/24:0)+ NH <sub>4</sub> | TG | 63 | + | 45.07 | 98.74 |
| 314 | TG(18:1/20:4/22:0)+H                | TG | 63 | + | 0.00  | 0.00  |
| 315 | TG(18:1/20:4/22:1)+H                | TG | 63 | + | 0.00  | 0.00  |
| 316 | TG(18:2/17:1/18:2)+ NH <sub>4</sub> | TG | 56 | + | 50.67 | 98.79 |
| 317 | TG(18:2/17:3/17:3)+ NH <sub>4</sub> | TG | 55 | + | 0.00  | 0.00  |
| 318 | TG(18:3/17:1/18:2)+ NH <sub>4</sub> | TG | 56 | + | 50.09 | 98.77 |
| 319 | TG(18:3/17:2/18:2)+ NH <sub>4</sub> | TG | 56 | + | 47.53 | 98.68 |
| 320 | TG(18:3/17:3/17:3)+ NH <sub>4</sub> | TG | 55 | + | 2.95  | 93.79 |
| 321 | TG(18:3/17:3/18:2)+ NH <sub>4</sub> | TG | 56 | + | 45.19 | 98.59 |
| 322 | TG(18:3/17:3/18:3)+ NH <sub>4</sub> | TG | 56 | + | 42.22 | 98.47 |
| 323 | TG(18:3/17:3/20:5)+H                | TG | 58 | + | 0.00  | 0.00  |
| 324 | TG(18:3/18:2/18:2)+ NH <sub>4</sub> | TG | 57 | + | 47.59 | 98.71 |
| 325 | TG(18:3/18:2/18:2)+ NH <sub>4</sub> | TG | 57 | + | 1.45  | 92.84 |
| 326 | TG(18:3/18:2/18:3)+ NH <sub>4</sub> | TG | 57 | + | 47.07 | 98.69 |
| 327 | TG(18:3/18:3/18:3)+H                | TG | 57 | + | 0.00  | 0.00  |
| 328 | TG(18:3/18:3/18:3)+ NH <sub>4</sub> | TG | 57 | + | 45.90 | 98.64 |
| 329 | TG(18:3/18:3/20:5)+H                | TG | 59 | + | 0.05  | 87.89 |
| 330 | TG(18:4/16:1/16:1)+H                | TG | 53 | + | 0.00  | 0.00  |
| 331 | TG(18:4/16:1/18:3)+H                | TG | 55 | + | 0.00  | 0.00  |
| 332 | TG(18:4/16:2/18:3)+H                | TG | 55 | + | 0.00  | 0.00  |
| 333 | TG(18:4/17:1/18:1)+H                | TG | 56 | + | 0.13  | 88.81 |
| 334 | TG(18:4/17:2/18:3)+H                | TG | 56 | + | 0.00  | 0.00  |
| 335 | TG(18:4/18:2/18:3)+ NH <sub>4</sub> | TG | 57 | + | 0.00  | 0.00  |
| 336 | TG(18:4/18:3/18:3)+H                | TG | 57 | + | 0.00  | 0.00  |
| 337 | TG(18:4/18:3/18:3)+ NH <sub>4</sub> | TG | 57 | + | 0.00  | 0.00  |
| 338 | TG(19:0/18:1/18:1)+ NH <sub>4</sub> | TG | 58 | + | 43.47 | 98.57 |
| 339 | TG(19:1/16:0/18:3)+H                | TG | 56 | + | 0.00  | 0.00  |
| 340 | TG(19:1/18:1/18:1)+ NH <sub>4</sub> | TG | 58 | + | 46.29 | 98.68 |
| 341 | TG(19:1/18:1/18:2)+ NH <sub>4</sub> | TG | 58 | + | 41.30 | 98.49 |
| 342 | TG(19:1/18:1/18:3)+ NH <sub>4</sub> | TG | 58 | + | 51.67 | 98.87 |
| 343 | TG(19:3/18:2/18:3)+ NH <sub>4</sub> | TG | 58 | + | 0.80  | 92.02 |
| 344 | TG(19:4/18:2/18:3)+H                | TG | 58 | + | 0.00  | 0.00  |
| 345 | TG(19:4/18:3/18:3)+ NH <sub>4</sub> | TG | 58 | + | 0.00  | 0.00  |
| 346 | TG(19:5/18:2/18:3)+H                | TG | 58 | + | 0.00  | 0.00  |
| 347 | TG(20:0/18:1/18:1)+ NH <sub>4</sub> | TG | 59 | + | 41.18 | 98.51 |
| 348 | TG(20:0/18:1/18:3)+ NH <sub>4</sub> | TG | 59 | + | 37.58 | 98.35 |
| 349 | TG(20:1/18:1/18:1)+ NH <sub>4</sub> | TG | 59 | + | 0.00  | 0.00  |
| 350 | TG(20:1/18:2/18:2)+ NH <sub>4</sub> | TG | 59 | + | 46.05 | 98.69 |
| 351 | TG(20:3/18:2/18:2)+ NH <sub>4</sub> | TG | 59 | + | 41.89 | 98.54 |
| 352 | TG(20:5/17:1/18:2)+H                | TG | 58 | + | 0.00  | 0.00  |
| 353 | TG(24:3/18:1/18:3)+H                | TG | 63 | + | 0.00  | 0.00  |
| 354 | TG(24:4/16:0/16:0)+ NH <sub>4</sub> | TG | 59 | + | 0.00  | 0.00  |
| 355 | TG(54:11)+ NH <sub>4</sub>          | TG | 57 | + | 0.00  | 0.00  |
| 356 | TG(55:10p)+H                        | TG | 58 | + | 0.00  | 0.00  |
| 357 | TG(55:11)+ NH <sub>4</sub>          | TG | 58 | + | 0.44  | 91.07 |

**Table S5. The VIP values of significantly changing lipid species before and after normalisation on data acquired on three separate days.**

| Lipid species                          | Raw    | TIC    | <sup>13</sup> C-IS |
|----------------------------------------|--------|--------|--------------------|
| FA(18:2)-H                             | 1.4852 | 2.2246 | 0.0010             |
| LPC(16:0)+H                            | 6.0870 | 0.2225 | 0.5849             |
| LPC(16:0)+Na                           | 1.2142 | 0.8755 | 0.9661             |
| LPC(18:0)+H                            | 2.2400 | 0.5722 | 2.0485             |
| PC(34:1)+H                             | 2.0250 | 3.3773 | 0.0493             |
| PC(34:2)+H                             | 2.9357 | 5.6058 | 0.0062             |
| PC(36:2)+H                             | 2.2591 | 3.8371 | 0.0224             |
| PC(36:3)+H                             | 1.0649 | 3.0939 | 0.0014             |
| PC(36:4)+H                             | 1.7327 | 2.2890 | 0.0002             |
| PC(38:4)+H                             | 1.2105 | 1.5941 | 1.3170             |
| TG(16:0)/(16:0)/(16:1)+NH <sub>4</sub> | 1.2865 | 0.8146 | 0.1529             |
| TG(16:0)/(18:1)/(18:1)+NH <sub>4</sub> | 4.1338 | 2.9869 | 0.0268             |
| TG(16:0)/(18:2)/(18:2)+NH <sub>4</sub> | 2.9488 | 2.2587 | 0.0085             |
| TG(16:1)/(16:1)/(18:1)+NH <sub>4</sub> | 1.6273 | 1.5207 | 0.0033             |
| TG(18:1)/(18:2)/(18:2)+NH <sub>4</sub> | 1.1443 | 0.8173 | 0.0056             |

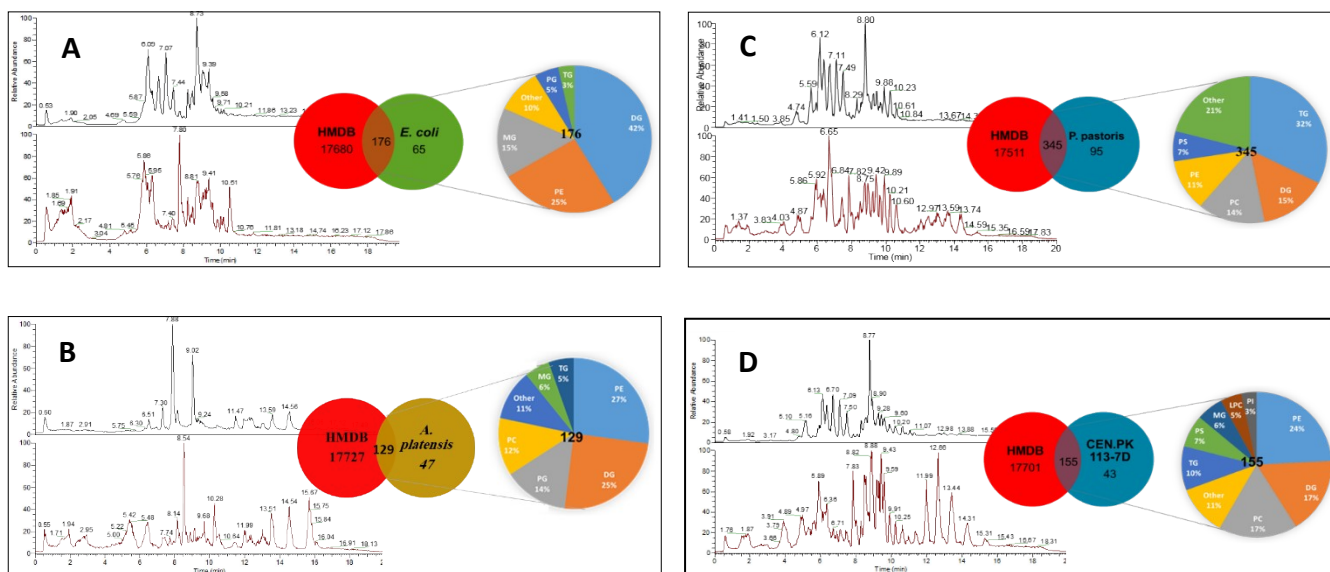

**Figure S1.** Total ion current (TIC) chromatograms of all microorganism extracts with ESI in negative (in black) and positive mode (in red). A) *E. coli*; B) *A. platensis* (spirulina); C) *P. pastoris*; D) *S. cerevisiae* CEN.PK113-7D. The intersections of the lipids dataset from HMDB and each strain are represented by circles. The pie charts show the total number of lipids (in the centre) extracted from each strain and identified by LipidSearch in positive and negative mode that are in common to HMDB.

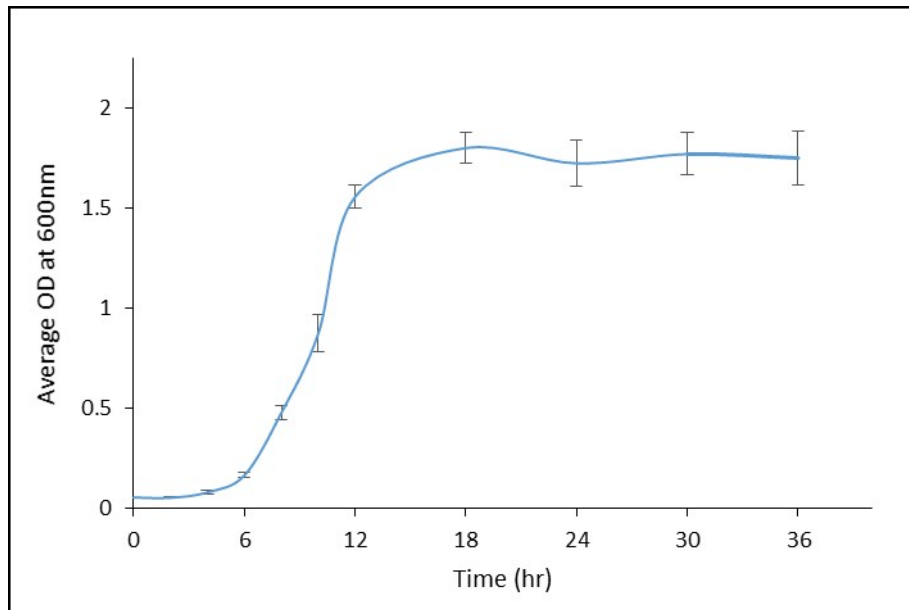

**Figure S2.** Growth curve of *E. coli* MG1655 in minimal media (n=3). The OD<sub>600</sub> of the culture was measured every 2 h for 36 h to investigate the growth rate of *E. coli* in minimal media. This media can support *E. coli* growth and the cells enter the stationary phase after ~12 h of inoculation.

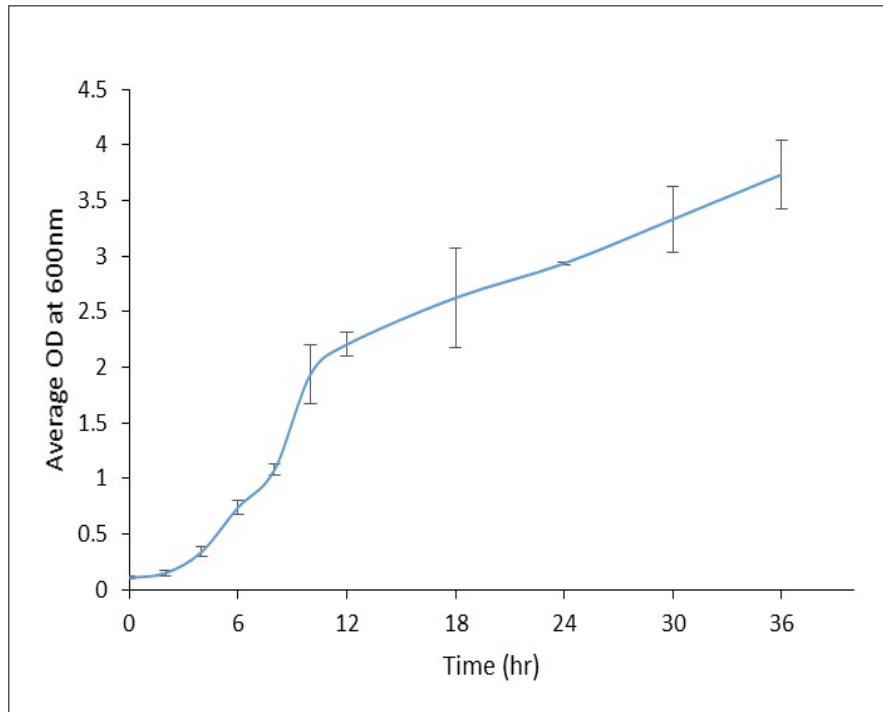

**Figure S3.** Growth curve of *S. cerevisiae* CEN.PK 113-7D in selected minimal media (n=3). The OD<sub>600</sub> was measured every 2 h for 36 h to investigate the growth rate of *S. cerevisiae* in minimal media. This media can support *S. cerevisiae* growth and the cells enter the stationary phase after ~12 h of inoculation.

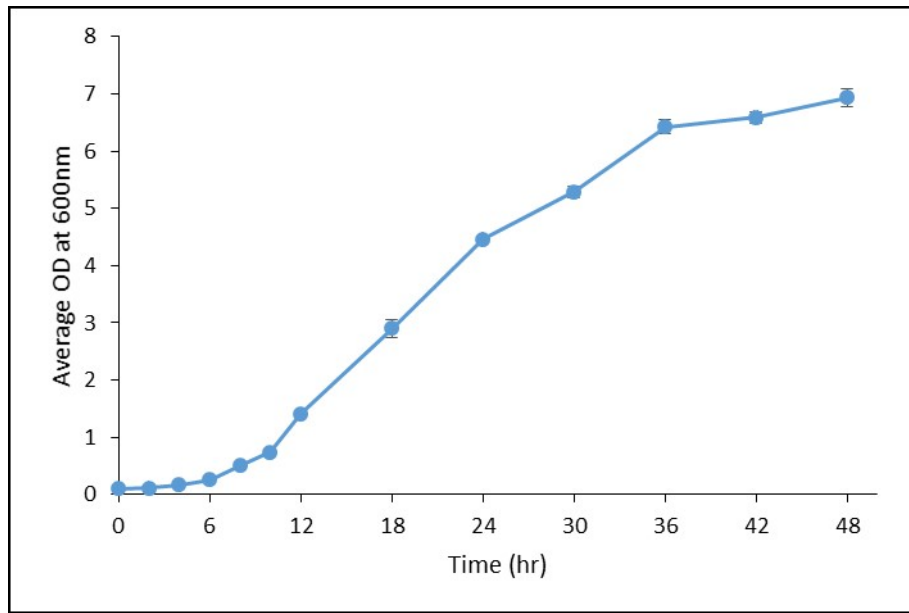

**Figure S4.** Growth curve of *P. pastoris* NCYC175 in selected minimal media (n=3). The OD<sub>600</sub> of the culture was measured every 2 h for 48 h to investigate the growth rate of *P. pastoris* in minimal media. This media can support *P. pastoris* growth and the cells enter the stationary phase after ~36 h of inoculation.

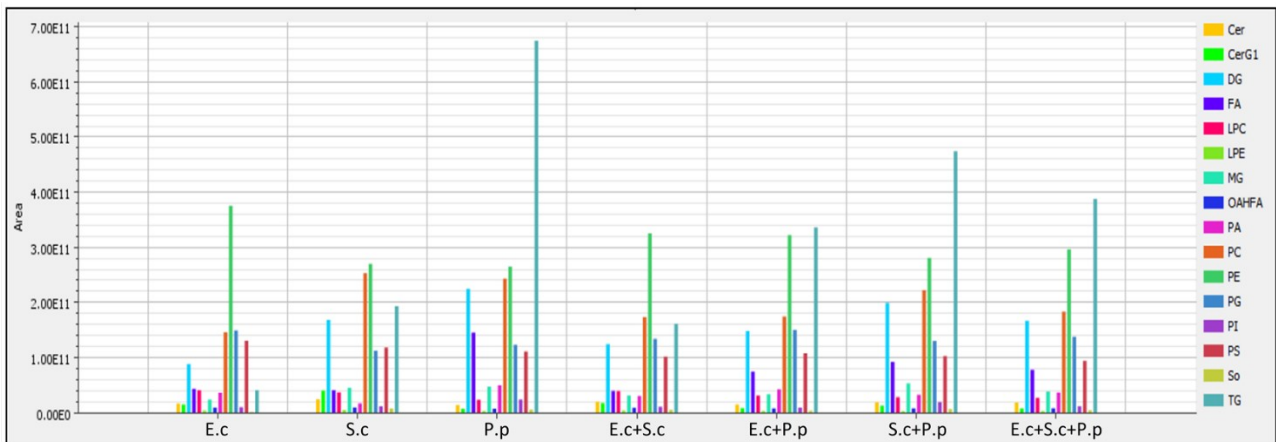

**Figure S5.** Lipid class profiles of *E. coli* MG1655, *S. cerevisiae* CEN.PK 113-7D and *P. pastoris* NCYC 175, and different combinations of these species. Abbreviations: E.c- *E. coli* extract, S.c- *S. cerevisiae* CEN.PK extract, P.p- *P. pastoris* extract.



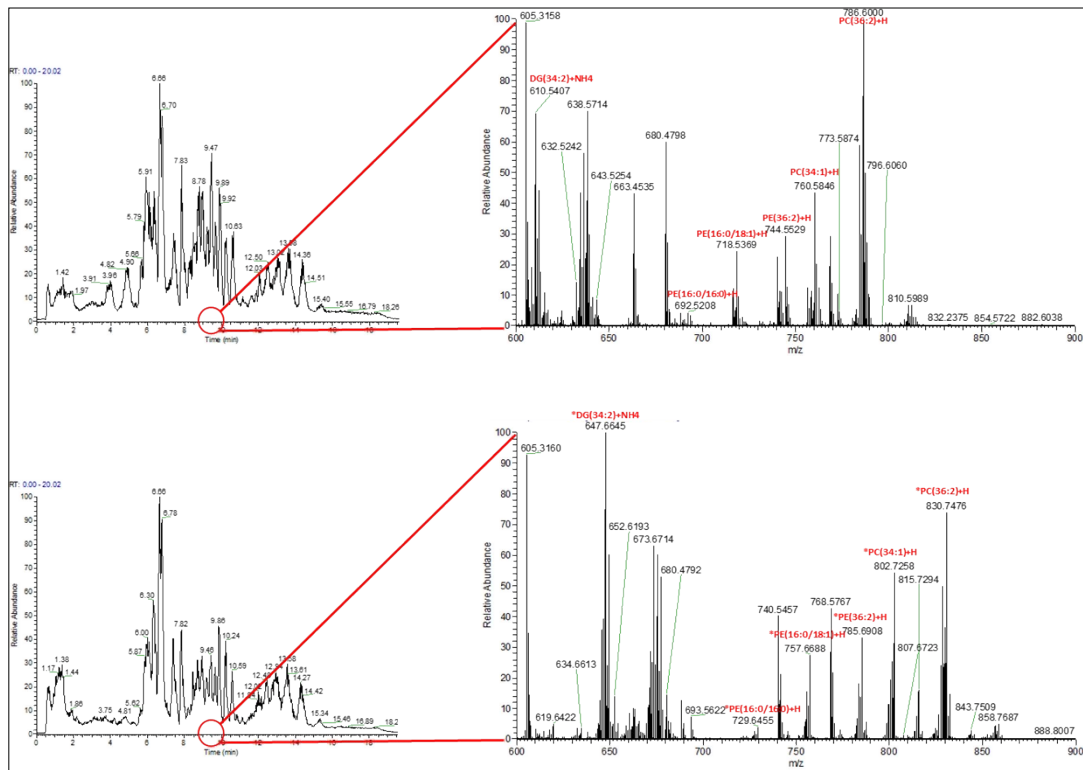

**Figure S6.** Comparison of LC-MS chromatogram (left side) and full scan MS spectra (right side) of recorded unlabelled (top) and labelled (bottom) *P. pastoris* extract in positive mode between 9-10 min within the  $m/z$  range of 600-900.

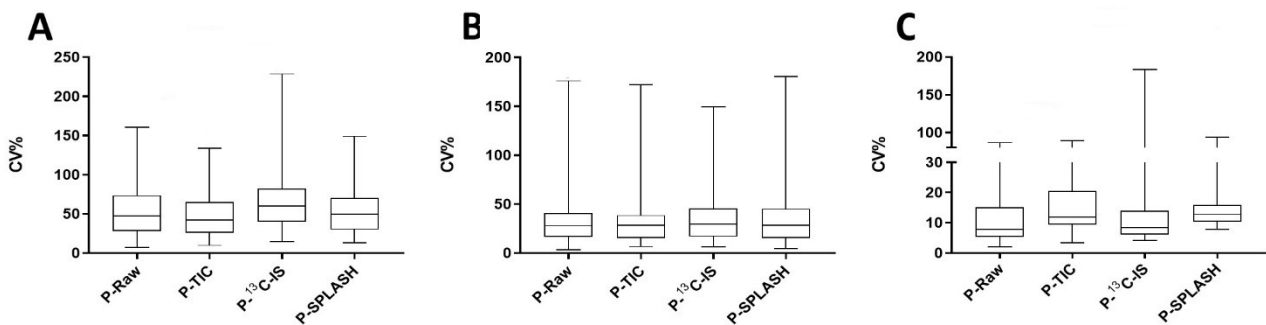

**Figure S7.** Coefficient of variance distributions for normalization of different set of samples using different methods presented by box and whisker plots. Data normalized by TIC (P-TIC),  $^{13}\text{C}$ -IS (P- $^{13}\text{C}$ -IS), and by SPLASH® solution (P-SPLASH) were compared to raw un-normalized data. **(A)** Common ions (112) between human plasma samples and  $^{13}\text{C}$ -yeast extract ( $n=6$ ); **(B)** Common ions (132) between mouse plasma samples and  $^{13}\text{C}$ -yeast extract ( $n=6$ ); **(C)** Common ions (102) between pooled plasma samples and  $^{13}\text{C}$ -yeast extract.
